# Supplementary material for: Rational design of FAK inhibitors for autoimmune therapy: a SAR and molecular modeling approach for chemically driven drug discovery
Source: Royal Society of Chemistry journal article supplement (doi:10.1039/d5nj03059e), 2025-01-01
Supplement: d5nj03059e1.xlsx [file d5nj03059e1.xlsx]

## Sheet: Data set
molecule	Smiles	logIC50
1	O=C1CN2C(=NN1)COc1ccccc12	5.193124598
2	Nc1ccccc1NC(=O)c1ccc(CSc2nnc(-c3ccncc3)n2-c2ccccc2)cc1	4.982813762
3	CCn1c(SCCCCCC(=O)O)nnc1-c1ccncc1	4.882011962
4	CNc1nc(Nc2cc(OC)c(OC)c(OC)c2)nc(Nc2ccccc2NS(C)(=O)=O)n1	4.818885415
5	Cn1c(SCc2ccc(C(=O)NO)cc2)nnc1-c1ccncc1	4.808548551
6	COc1cc(Nc2nc(Cl)nc(Nc3cccc(NS(C)(=O)=O)c3)n2)cc(OC)c1OC	4.761927838
7	Cn1c(SCCCCCC(=O)Nc2ccccc2N)nnc1-c1ccncc1	4.756483964
8	COc1cc(Nc2nc(C)nc(Nc3ccccc3NC(=O)N(C)C)n2)cc(OC)c1OC	4.73479983
9	Cn1c(SCc2ccc(C(=O)Nc3ccccc3N)cc2)nnc1-c1ccncc1	4.725258066
10	COc1cc(Nc2nc(C)nc(Nc3ccccc3NC(C)=O)n2)cc(OC)c1OC	4.705863712
11	Cn1c(SCCCCCC(=O)O)nnc1-c1ccncc1	4.701567985
12	COc1cc(C2=C(c3cn(C)c4ccccc34)C(=O)NC2)cc(OC)c1OC	4.698970004
13	C=CCn1c(SCc2ccc(C(=O)NO)cc2)nnc1-c1ccncc1	4.663889299
14	COc1cc(C2=C(c3cn(COc4ccccc4)c4ccccc34)CNC2=O)cc(OC)c1OC	4.633468456
15	COc1cc(Nc2nc(Cl)nc(Nc3ccccc3NS(C)(=O)=O)n2)cc(OC)c1OC	4.622214023
16	CNc1nc(Nc2cccc(NS(C)(=O)=O)c2)nc(Nc2cc(OC)c(OC)c(OC)c2)n1	4.615950052
17	COc1cc(C2=C(c3cn(COCc4ccccc4)c4ccccc34)CNC2=O)cc(OC)c1OC	4.602059991
18	C=CCn1c(SCC(=O)Nc2ccc(C(=O)O)cc2)nnc1-c1ccncc1	4.560743301
19	O=C(O)CCCCCSc1nnc(-c2ccncc2)n1-c1ccccc1	4.557627488
20	COC(=O)Nc1ccccc1Nc1nc(C)nc(Nc2cc(OC)c(OC)c(OC)c2)n1	4.555094449
21	COCn1cc(C2=C(c3cc(OC)c(OC)c(OC)c3)C(=O)NC2)c2ccccc21	4.544068044
22	Cc1ccc(CSc2nnc(Cn3nnc4ccccc43)o2)cc1	4.5289167
23	Fc1ccc(CSc2nnc(Cn3nnc4ccccc43)o2)cc1F	4.526339277
24	COc1ccccc1/C=C\c1ncc([N+](=O)[O-])n1CCOC(=O)c1cccc2c1OCCO2	4.478133428
25	Cc1ccc(C2=NN(C(N)=S)C(c3ccc4ccccc4c3)C2)cc1	4.457881897
26	COc1ccc(/C=C\c2ncc([N+](=O)[O-])n2CCOC(=O)c2cccc3c2OCCO3)cc1	4.457427693
27	Clc1ccc(CSc2nnc(Cn3nnc4ccccc43)o2)cc1Cl	4.45484486
28	CCOCn1cc(C2=C(c3cc(OC)c(OC)c(OC)c3)C(=O)NC2)c2ccccc21	4.447158031
29	COc1cc(C2=C(c3cn(COC(C)(C)C)c4ccccc34)CNC2=O)cc(OC)c1OC	4.447158031
30	COc1cc(C2=C(c3cn(COC(C)C)c4ccccc34)CNC2=O)cc(OC)c1OC	4.431363764
31	Cc1ccc(/C=C\c2ncc([N+](=O)[O-])n2CCOC(=O)c2cccc3c2OCCO3)cc1	4.423900919
32	COc1ccc(N(Cc2cc(Br)ccc2O)C(=O)Nc2ccccc2)c(F)c1	4.423245874
33	COc1cccc(/C=C\c2ncc([N+](=O)[O-])n2CCOC(=O)c2cccc3c2OCCO3)c1	4.387923467
34	COc1cc(Nc2ncnc(Nc3ccccc3C(=O)NCCO)n2)cc(OC)c1OC	4.376576957
35	Brc1ccc(CSc2nnc(Cn3nnc4ccccc43)o2)cc1	4.374748346
36	Cc1ccccc1/C=C\c1ncc([N+](=O)[O-])n1CCOC(=O)c1cccc2c1OCCO2	4.371806459
37	O=C(NO)c1ccc(CSc2nnc(-c3ccncc3)n2-c2ccccc2)cc1	4.350248018
38	CONC(=O)c1ccccc1Nc1nc(Nc2cc(C)nn2C(C)C)ncc1Cl	4.345177617
39	COc1ccc(Nc2ncnc(Nc3ccccc3NC(C)=O)n2)c(OC)c1	4.324282455
40	COCc1c(C)c(O)c(O)c(O)c1C=O	4.31386722
41	O=C(OCCn1c([N+](=O)[O-])cnc1/C=C\c1ccccc1)c1cccc2c1OCCO2	4.31302311
42	O=C(CSc1nnc(-c2ccncc2)n1-c1ccccc1)N/N=C/C=C/c1ccccc1	4.287353773
43	O=C(OCCn1c([N+](=O)[O-])cnc1/C=C\c1ccc(Cl)cc1)c1cccc2c1OCCO2	4.265289626
44	O=C(CSc1nnc(-c2ccncc2)n1-c1ccccc1)Nc1ccc(C(=O)O)cc1	4.257678575
45	COc1cc2nccc(Oc3ccc(NC(=O)c4c(Nc5ccccc5)ccn(-c5ccccc5)c4=O)nc3)c2cc1OC	4.255272505
46	COC(=O)c1ccccc1Nc1ncnc(Nc2cc(OC)c(OC)c(OC)c2)n1	4.252853031
47	O=C(CSc1nnc(-c2ccncc2)n1-c1ccccc1)N/N=C/c1ccc(F)cc1	4.240549248
48	Fc1ccc(CSc2nnc(-c3ccncc3)n2-c2ccccc2)c(F)c1	4.240049772
49	CNc1ccn(-c2ccccc2)c(=O)c1C(=O)Nc1ccc(Oc2ccnc3cc(OC)c(OC)cc23)cn1	4.230448921
50	COC1OC(=O)c2c(O)c(O)c(O)c(C)c21	4.212187604
51	Cc1cccc(/C=C\c2ncc([N+](=O)[O-])n2CCOC(=O)c2cccc3c2OCCO3)c1	4.209783015
52	Cc1cccc(CSc2nnc(Cn3nnc4ccccc43)o2)c1	4.198657087
53	C=CCn1c(SCc2ccc(C(=O)Nc3ccccc3N)cc2)nnc1-c1ccncc1	4.193124598
54	Brc1cccc(CSc2nnc(-c3ccncc3)n2-c2ccccc2)c1	4.165541077
55	C=CCn1c(SCCCCCC(=O)Nc2ccccc2N)nnc1-c1ccncc1	4.155336037
56	Brc1cccc(CSc2nnc(Cn3nnc4ccccc43)o2)c1	4.152288344
57	COc1ccc(C2=NN(C(N)=S)C(c3cccc4ccccc34)C2)cc1	4.133538908
58	Cn1c(SCCCCCC(=O)NO)nnc1-c1ccncc1	4.10002573
59	O=C(OCCn1c([N+](=O)[O-])cnc1/C=C\c1ccccc1Br)c1cccc2c1OCCO2	4.094471129
60	Cc1ccccc1CSc1nnc(Cn2nnc3ccccc32)o1	4.08278537
61	O=C(CSc1nnc(-c2ccncc2)n1-c1ccccc1)N/N=C/c1ccc(Cl)cc1	4.078456818
62	Cc1ccc(C2=NN(c3ccccc3)C(c3ccc4ccccc4c3)C2)cc1	4.06069784
63	Cc1ccc(N(Cc2cc(Br)ccc2O)C(=O)Nc2ccccc2)c(F)c1	4.026533265
64	Cc1ncc([N+](=O)[O-])n1CCOc1ncnc2ccc([N+](=O)[O-])cc12	4.017033339
65	O=C(OCCn1c([N+](=O)[O-])cnc1/C=C\c1cccc(Br)c1)c1cccc2c1OCCO2	4.014520539
66	COc1ccc(C2=NN(c3ccccc3)C(c3cccc4ccccc34)C2)cc1	4.012837225
67	COc1cc(Nc2ncnc(Nc3ccccc3C(=O)NCCN(C)C)n2)cc(OC)c1OC	4.008600172
68	NC(=S)N1N=C(c2ccc(Cl)c(Cl)c2)CC1c1ccc2ccccc2c1	3.995635195
69	Brc1ccccc1CSc1nnc(Cn2nnc3ccccc32)o1	3.991226076
70	COc1cc(C2=C(c3c[nH]c4ccccc34)CNC2=O)cc(OC)c1OC	3.977723605
71	Clc1ccccc1CSc1nnc(Cn2nnc3ccccc32)o1	3.977723605
72	COc1cc(Br)c(/C=C2\CC(C)C/C(=C\c3nc(C)c(C)nc3C)C2=O)cc1OC	3.977723605
73	O=[N+]([O-])c1ccc(CSc2nnc(Cn3nnc4ccccc43)o2)cc1	3.963787827
74	COc1cc(Nc2ncnc(Nc3cccc(NS(C)(=O)=O)c3)n2)cc(OC)c1OC	3.963787827
75	O=C(CSc1nnc(-c2ccncc2)n1-c1ccccc1)N/N=C/c1ccc(Br)cc1	3.962369336
76	Fc1ccc(CSc2nnc(Cn3nnc4ccccc43)o2)cc1	3.959041392
77	Cc1ccc(-n2nc(C(C)(C)C)cc2NC(=O)Nc2ccc(-n3ccnc3)cc2)cc1	3.959041392
78	COc1cc(Nc2ncc3ccn(-c4ccncc4)c3n2)cc(OC)c1OC	3.954242509
79	COc1cc(NC2=Nc3nccn3C(Cc3ccccc3NC(C)=O)N2)cc(OC)c1OC	3.949877704
80	Cc1cnc2[nH]ccc2c1NCc1cccnc1N(C)S(C)(=O)=O	3.944482672
81	COc1ccc(CSc2nnc(Cn3nnc4ccccc43)o2)cc1	3.934498451
82	Cc1ccc(-n2nc(C(C)(C)C)cc2NC(=O)Nc2ccc(-n3cnc(Cl)c3Cl)cc2)cc1	3.924279286
83	CN1CCN(c2nc(C3=C(c4c[nH]c5ccccc45)C(=O)NC3=O)c3ccccc3n2)CC1	3.919078092
84	Clc1cccc(CSc2nnc(Cn3nnc4ccccc43)o2)c1	3.919078092
85	O=C(OCCn1c([N+](=O)[O-])cnc1/C=C\c1ccc(F)cc1)c1cccc2c1OCCO2	3.903632516
86	Cc1cc(I)ccc1Nc1ncc2ccn(-c3ccccn3)c2n1	3.903089987
87	COc1cc(Nc2ncc3ccn(Cc4cccnc4)c3n2)cc(OC)c1OC	3.897627091
88	COc1cc(Nc2nc(C)nc(Nc3ccccc3NS(C)(=O)=O)n2)cc(OC)c1OC	3.897627091
89	COc1cc(Br)c(/C=C2\CC(C)CC(=C\c3nc(C)c(C)nc3C)/C2=N/O)cc1OC	3.892094603
90	COc1cc2nc(C)oc2c(C[C@]2(C)[C@@H](C)CC[C@@]3(C)C(C)=CCC[C@H]32)c1O	3.890979597
91	Cc1ccc(-n2nc(C(C)(C)C)cc2NC(=O)Nc2ccc(-n3cnc(C)c3)cc2)cc1	3.886490725
92	O=[N+]([O-])c1ccccc1CSc1nnc(Cn2nnc3ccccc32)o1	3.880813592
93	CNC(=O)c1cccc(-n2ccc3cnc(Nc4cc(OC)c(OC)c(OC)c4)nc32)n1	3.877946952
94	Cc1c(O)c(O)c(O)c2c1COC2=O	3.876217841
95	COc1cccc(CSc2nnc(Cn3nnc4ccccc43)o2)c1	3.875061263
96	COc1cc(Nc2ncc3ccn(CCc4ccncc4)c3n2)cc(OC)c1OC	3.875061263
97	C#Cc1cccc(Nc2ncnc3cc(OCCOC)c(OCCOC)cc23)c1	3.86923172
98	COc1cc(Nc2ncc3ccn(-c4ccc(C(C)(C)C)cc4)c3n2)cc(OC)c1OC	3.864511081
99	O=C1N/C=C/c2ccc(c(Br)c2)Oc2cc(cc(Br)c2O)CCNC(=O)/C(=N/O)Cc2ccc(c(Br)c2)Oc2cc(cc(Br)c2O)C/C1=N\O	3.86332286
100	Fc1cccc(CSc2nnc(Cn3nnc4ccccc43)o2)c1	3.851258349
101	COc1ccccc1CSc1nnc(Cn2nnc3ccccc32)o1	3.851258349
102	Cc1nc(C)c(/C=C2\CC(C)C/C(=C\c3nc(C)c(C)nc3C)C2=O)nc1C	3.84509804
103	O=[N+]([O-])c1cccc(CSc2nnc(Cn3nnc4ccccc43)o2)c1	3.84509804
104	Cc1ccc(-n2nc(C(C)(C)C)cc2NC(=O)Nc2ccc(-c3cccnc3)cc2)cc1	3.84509804
105	FC(F)(F)c1ccccc1Nc1ncc2ccn(-c3ccccn3)c2n1	3.84509804
106	Brc1cccc(-c2nnc(Cn3nnc4ccccc43)o2)c1	3.819543936
107	O=C(OCCn1c([N+](=O)[O-])cnc1/C=C\c1ccccc1Cl)c1cccc2c1OCCO2	3.8162413
108	COC(=O)c1ccc(-n2ccc3cnc(Nc4cc(OC)c(OC)c(OC)c4)nc32)cc1	3.812913357
109	Clc1ccc(C2=NN(c3ccccc3)C(c3ccc4ccccc4c3)C2)cc1Cl	3.792391689
110	COc1cc(Nc2ncnc(Nc3ccccc3C(=O)NC3CC3)n2)cc(OC)c1OC	3.785329835
111	COc1ccc(Nc2ncnc(Nc3ccccc3NS(C)(=O)=O)n2)c(OC)c1	3.785329835
112	CCC(CC)NC(=O)c1ccccc1Nc1ncnc(Nc2cc(OC)c(OC)c(OC)c2)n1	3.77815125
113	COc1cc(Nc2ncc3ccn(-c4cccc(CC(=O)NC5CCCC5)c4)c3n2)cc(OC)c1OC	3.763427994
114	Brc1ccc(-c2nnc(Cn3nnc4ccccc43)o2)cc1	3.755874856
115	CC1(C)OCC(=O)Nc2cc(Nc3nc(NCC(F)(F)F)c4occc4n3)ccc21	3.740362689
116	Cc1nc(C)c(/C=C2\CC(C)C/C(=C\c3nc(C)c(C)nc3C)C2=NO)nc1C	3.740362689
117	O=C(OCCn1c([N+](=O)[O-])cnc1/C=C\c1cccc(F)c1)c1cccc2c1OCCO2	3.716837723
118	COc1cc(Nc2ncnc(Nc3ccccc3C(=O)NC3CCCC3)n2)cc(OC)c1OC	3.716003344
119	CCCCc1ccc(-n2ccc3cnc(Nc4cc(OC)c(OC)c(OC)c4)nc32)cc1	3.709269961
120	COc1cc(Nc2ncnc(Nc3ccccc3NS(C)(=O)=O)n2)cc(OC)c1OC	3.707570176
121	COc1cc(Nc2ncc3ccn(-c4cccc(C(=O)NCC(C)C)c4)c3n2)cc(OC)c1OC	3.704150517
122	Cc1ccc(-n2nc(C(C)(C)C)cc2NC(=O)Nc2ccc(-c3ccc(N)nc3)cc2)cc1	3.698970004
123	CN(c1ncccc1CNc1ccnc2[nH]c(-c3ccc(F)cc3)cc12)S(C)(=O)=O	3.681241237
124	Cc1n[nH]c2cc(Nc3nc(NC4CC4)c4occc4n3)ccc12	3.680335513
125	COC(=O)c1cc(O)c(O)c(C[C@]2(C)[C@@H](C)CC[C@@]3(C)C(C)=CCC[C@H]32)c1	3.658964843
126	CN(c1ncccc1CNc1c(Br)cnc2[nH]c(-c3ccc(F)cc3)nc12)S(C)(=O)=O	3.653212514
127	N=C(N)SCCCn1c(=O)c2c(c1=O)n1c3ccccc3cc1c1cccc3ccn2c31	3.643452676
128	O=C(OCCn1c([N+](=O)[O-])cnc1/C=C\c1ccccc1F)c1cccc2c1OCCO2	3.63748973
129	CN1c2ccc(Nc3ccc(F)cc3)cc2-c2c(cnn2C)S1(=O)=O	3.633468456
130	COc1cc(Nc2ncc3ccn(-c4cccc(C(=O)NC5CCCC5)c4)c3n2)cc(OC)c1OC	3.613841822
131	COc1cc(Nc2ncc3ccn(-c4ccccc4[N+](=O)[O-])c3n2)cc(OC)c1OC	3.607455023
132	CS(=O)(=O)Nc1cccc(-c2csc3cnc(N)nc23)c1	3.605520523
133	Clc1ccccc1Cc1nnc(Cn2nnc3ccccc32)o1	3.591064607
134	Clc1cccc(-c2nnc(Cn3nnc4ccccc43)o2)c1	3.591064607
135	Fc1cccc(-c2nnc(Cn3nnc4ccccc43)o2)c1	3.579783597
136	O=[N+]([O-])c1ccc(-c2nnc(Cn3nnc4ccccc43)o2)cc1	3.579783597
137	COc1cccc(-c2nnc(Cn3nnc4ccccc43)o2)c1	3.544068044
138	O=C(NCCc1ccc(O)c(Br)c1)/C(Cc1cc(Br)c(O)c(Oc2ccc(CCNC(=O)/C(Cc3cc(Br)c(O)c(-c4cc(C/C(=N\O)C(=O)NCCc5ccc(O)c(Br)c5)cc(Br)c4O)c3)=N/O)cc2Br)c1)=N/O	3.544068044
139	CN1c2ccc(-c3ccc(C(N)=O)cc3)cc2-c2[nH]ncc2S1(=O)=O	3.544068044
140	CCCNS(=O)(=O)c1ccccc1-n1ccc2cnc(Nc3cc(OC)c(OC)c(OC)c3)nc21	3.544068044
141	Cc1nc(C)c(/C=C2\CN(C)C/C(=C\c3nc(C)c(C)nc3C)C2=O)nc1C	3.544068044
142	O=C(OCCn1c([N+](=O)[O-])cnc1/C=C\c1cccc(Cl)c1)c1cccc2c1OCCO2	3.534026106
143	Fc1cccc(Cc2nnc(Cn3nnc4ccccc43)o2)c1	3.51851394
144	COc1cc(Nc2ncc3ccn(-c4ccc([N+](=O)[O-])cc4)c3n2)cc(OC)c1OC	3.509202522
145	Clc1cccc(Cc2nnc(Cn3nnc4ccccc43)o2)c1	3.505149978
146	COc1ccccc1-c1nnc(Cn2nnc3ccccc32)o1	3.505149978
147	COc1ccc(-c2nnc(Cn3nnc4ccccc43)o2)cc1	3.505149978
148	S=c1oc(-c2ccc3c(c2)OCCO3)nn1CN1CCN(c2ccc(Cl)c(Cl)c2)CC1	3.494154594
149	CC1=CCC[C@@H]2[C@@]1(C)CC[C@H](C)[C@@]2(C)CC1=C(O)C(=O)C=C(NCCC(C)C)C1=O	3.481442629
150	Cc1ccc(I)cc1Nc1ncc2ccn(-c3ccccn3)c2n1	3.477121255
151	Cc1nc(C)c(/C=C2\CN(C)C/C(=C\c3nc(C)c(C)nc3C)C2=NO)nc1C	3.462397998
152	Brc1ccc(Cc2nnc(Cn3nnc4ccccc43)o2)cc1	3.462397998
153	COc1cc(Nc2ncc3ccn(-c4ccc(C(=O)O)cc4)c3n2)cc(OC)c1OC	3.45331834
154	COc1cc(Nc2ncc3ccn(-c4ccccc4C(=O)O)c3n2)cc(OC)c1OC	3.450249108
155	COc1cc(Nc2ncc3ccn(-c4ccccc4C)c3n2)cc(OC)c1OC	3.44870632
156	O=[N+]([O-])c1ccc(N2CCN(Cn3nc(-c4ccc5c(c4)OCCO5)oc3=S)CC2)cc1	3.440909082
157	CNS(=O)(=O)c1cccc(-n2ccc3cnc(Nc4cc(OC)c(OC)c(OC)c4)nc32)c1	3.432969291
158	Brc1cccc(Cc2nnc(Cn3nnc4ccccc43)o2)c1	3.414973348
159	COc1cc(Nc2nnc(Cl)c(Nc3cccc(NS(C)(=O)=O)c3)n2)cc(OC)c1OC	3.397940009
160	COc1ccc(N2CCN(Cn3nc(-c4ccc5c(c4)OCCO5)oc3=S)CC2)cc1	3.389166084
161	COc1cccc(N2CCN(Cn3nc(-c4ccc5c(c4)OCCO5)oc3=S)CC2)c1	3.389166084
162	S=c1oc(-c2ccc3c(c2)OCCO3)nn1CN1CCN(c2ccccn2)CC1	3.389166084
163	O=C(CSc1nnc(-c2ccncc2)n1-c1ccccc1)N/N=C/c1cc(Br)ccc1O	3.382017043
164	CN1c2ccc(NC(=O)c3ccc(F)cc3)cc2-c2c(cnn2C)S1(=O)=O	3.380211242
165	CN(c1ncccc1CNc1c(C#N)cnc2[nH]ccc12)S(C)(=O)=O	3.380211242
166	COc1cc(Br)c(/C=C2\CN(C)C/C(=C\c3nc(C)c(C)nc3C)C2=O)cc1OC	3.380211242
167	CS(=O)(=O)Nc1cccc(-c2csc3cnc(NC4CC4)nc23)c1	3.371990911
168	CS(=O)(=O)Nc1ccccc1Nc1ncnc(Nc2ccc(CN)cc2)n1	3.361727836
169	COc1cc(Nc2ncnc(Nc3ccccc3C(=O)NC(C)C)n2)cc(OC)c1OC	3.342422681
170	c1ccc(Cc2nnc(Cn3nnc4ccccc43)o2)cc1	3.342422681
171	O=C(NCCc1ccc(O)c(Br)c1)/C(Cc1cc(Br)c(O)c(-c2cc(C/C(=N/O)C(=O)NCCc3ccc(O)c(Br)c3)cc(Br)c2O)c1)=N\O	3.322219295
172	CN1c2ccc(CNc3ccc(F)cc3)cc2-c2c(cnn2C)S1(=O)=O	3.301029996
173	COc1cc(Cl)c(/C=C2\CN(C(C)C)C/C(=C\c3nc(C)c(C)nc3C)C2=O)cc1OC	3.301029996
174	CSc1cccc(Nc2ncc3ccn(-c4ccccn4)c3n2)c1	3.301029996
175	S=c1oc(-c2ccc3c(c2)OCCO3)nn1CN1CCN(Cc2ccccc2)CC1	3.294466226
176	O=[N+]([O-])c1ccc(Cc2nnc(Cn3nnc4ccccc43)o2)cc1	3.278753601
177	COc1cc(Br)c(/C=C2\CN(C)CC(=C\c3nc(C)c(C)nc3C)/C2=N\O)cc1OC	3.278753601
178	CCC(CC)NC(=O)c1ccccc1Nc1ncnc(Nc2ccc(CN)cc2)n1	3.278753601
179	CNC(=O)Cc1cccc(-n2ccc3cnc(Nc4cc(OC)c(OC)c(OC)c4)nc32)c1	3.257678575
180	COc1cc2nccc(Oc3ccc(NC(=O)c4cc(Cc5ccccc5)cn(-c5ccccc5)c4=O)nc3)c2cc1OC	3.255272505
181	COCCNc1ccn(-c2ccccc2)c(=O)c1C(=O)Nc1ccc(Oc2ccnc3cc(OC)c(OC)cc23)cn1	3.255272505
182	COc1cc(Br)c(/C=C2\CN(C(C)C)CC(=C\c3nc(C)c(C)nc3C)/C2=N/O)cc1OC	3.255272505
183	COc1ccc(Cc2nnc(Cn3nnc4ccccc43)o2)cc1	3.255272505
184	O=C(OCCn1c([N+](=O)[O-])cnc1/C=C\c1ccc(Br)cc1)c1cccc2c1OCCO2	3.243038049
185	CS(=O)(=O)Nc1ccccc1Nc1nc(Nc2ccc(C#N)cc2)n2ccnc2n1	3.238046103
186	CCOC(=O)c1ccccc1-c1csc2cnc(Nc3ccc(N4CCN(CC)CC4)cc3)nc12	3.216165902
187	CCc1ccc(-n2ccc3cnc(Nc4cc(OC)c(OC)c(OC)c4)nc32)cc1	3.184691431
188	COc1cc(Nc2ncc3ccn(-c4ccc(C(F)(F)F)cc4)c3n2)cc(OC)c1OC	3.178976947
189	COC(=O)c1cccc(-n2ccc3cnc(Nc4cc(OC)c(OC)c(OC)c4)nc32)c1	3.178113252
190	CNC(=O)c1ccccc1Nc1ncnc(Nc2ccc(OC)cc2OC)n1	3.176091259
191	Brc1ccccc1Nc1ncc2ccn(-c3ccccn3)c2n1	3.176091259
192	COc1ccccc1N1CCN(Cn2nc(-c3ccc4c(c3)OCCO4)oc2=S)CC1	3.164352856
193	CN1c2ccc(NCc3ccc(Br)cc3)cc2-c2c(cnn2C)S1(=O)=O	3.146128036
194	COc1cc(Nc2ncc3ccn(-c4cccc(CC(=O)NCCCN)c4)c3n2)cc(OC)c1OC	3.123851641
195	COc1cc2nccc(Oc3ccc(NC(=O)c4c(NC5CCOCC5)ccn(-c5ccccc5)c4=O)nc3)c2cc1OC	3.113943352
196	O=c1c(O)c(-c2ccc(O)c(O)c2)oc2cc(O)cc(O)c12	3.079181246
197	Fc1ccccc1CSc1nnc(Cn2nnc3ccccc32)o1	3.079181246
198	Fc1ccccc1Nc1ncc2ccn(-c3ccccn3)c2n1	3.079181246
199	COC(=O)c1cccc(Nc2nc(Nc3cc(OC)c(OC)c(OC)c3)n3ccnc3n2)c1	3.079181246
200	Cc1nc(C)c(/C=C2\CN(C(C)C)C/C(=C\c3nc(C)c(C)nc3C)C2=O)nc1C	3.079181246
201	S=c1oc(-c2ccc3c(c2)OCCO3)nn1CN1CCN(c2ccccc2Cl)CC1	3.064457989
202	CNC(=O)c1ccccc1Nc1nc(Nc2ccc(C#N)cc2)n2ccnc2n1	3.049218023
203	S=c1oc(-c2ccc3c(c2)OCCO3)nn1CN1CCN(C(c2ccccc2)c2ccccc2)CC1	3.049218023
204	COc1cccc(Cc2nnc(Cn3nnc4ccccc43)o2)c1	3.041392685
205	C=COC(=O)NCc1ccc(Nc2nc(Nc3ccccc3C(=O)OC)nc3nccn23)cc1	3.021189299
206	O=C(OCCn1c([N+](=O)[O-])cnc1/C=C\c1cccc2ccccc12)c1cccc2c1OCCO2	3.004321374
207	CC(C)NC(=O)c1ccccc1Nc1ncnc(Nc2ccc(CN)cc2)n1	3
208	CSc1ccccc1Nc1ncc2ccn(-c3ccccn3)c2n1	3
209	Cc1nc(C)c(/C=C2\CN(C(C)C)C/C(=C\c3nc(C)c(C)nc3C)C2=NO)nc1C	3
210	CN1c2ccc(-c3ccc(C(=O)NCCO)cc3)cc2-c2[nH]ncc2S1(=O)=O	2.995635195
211	COc1cc(Nc2ncc3ccn(-c4cccc(C(=O)NCCCCN(C)C)c4)c3n2)cc(OC)c1OC	2.992553518
212	O=C(CCCn1[se]c2ccccc2c1=O)N[C@@H]1O[C@H](CO)[C@@H](O)[C@H](O)[C@H]1O	2.982271233
213	CS(=O)(=O)Nc1ccccc1Nc1nc(Nc2ccc(C#N)cc2)nc2nccn12	2.963787827
214	CC(=O)OC[C@H]1O[C@@H](NC(=O)CCCn2[se]c3ccccc3c2=O)[C@H](OC(C)=O)[C@@H](OC(C)=O)[C@@H]1OC(C)=O	2.963787827
215	Cc1cnc2[nH]c(-c3ccc(F)cc3)cc2c1NCc1cccnc1N(C)S(C)(=O)=O	2.959041392
216	CCc1ccccc1Nc1ncc2ccn(-c3ccccn3)c2n1	2.954242509
217	COc1cc(N2CCOCC2)ccc1Nc1nc(NC2CCCCC2)c2cc[nH]c2n1	2.949877704
218	COc1cc(Nc2ncc3ccn(-c4cccc(C(=O)NCCCO)c4)c3n2)cc(OC)c1OC	2.945468585
219	C=COC(=O)NCc1ccc(Nc2nc(Nc3ccccc3C(=O)NC)nc3nccn23)cc1	2.944482672
220	COC(=O)c1cccc(Nc2nc(Nc3cc(OC)c(OC)c(OC)c3)nc3nccn23)c1	2.939519253
221	CNC(=O)c1ccccc1Nc1nc(Nc2cc(C)c(Cl)cc2OC)nnc1Cl	2.939519253
222	COc1cc(Nc2nc(Cc3ccccc3NS(C)(=O)=O)nc3nccn23)cc(OC)c1OC	2.924279286
223	COc1cc(Nc2ncc3ccn(-c4ccc(SC)cc4)c3n2)cc(OC)c1OC	2.919601024
224	COc1cc(Nc2ncc3ccn(-c4ccnc(Cl)c4)c3n2)cc(OC)c1OC	2.903089987
225	COc1cc(Nc2ncc3ccn(-c4ccnc(Cl)n4)c3n2)cc(OC)c1OC	2.903089987
226	Cc1c(O)c(O)c(O)c(C=O)c1-c1cc2c(C=O)c(C)c(O)c(O)c2o1	2.903089987
227	COc1cc(Nc2ncc3ccn(-c4cnccc4F)c3n2)cc(OC)c1OC	2.903089987
228	FC(F)(F)c1cccc(N2CCN(Cn3nc(-c4ccc5c(c4)OCCO5)oc3=S)CC2)c1	2.892094603
229	COc1cc(Nc2ncc3ccn(-c4ccccc4CO)c3n2)cc(OC)c1OC	2.861534411
230	COc1cc(Nc2ncc3ccn(-c4cccc(CC(=O)NCCN)c4)c3n2)cc(OC)c1OC	2.861534411
231	CNC(=O)c1ccccc1Nc1nc(Nc2ccc(C#N)cc2)nc2nccn12	2.851258349
232	CN(c1ncccc1CNc1c(C(F)(F)F)cnc2[nH]c(-c3ccc(Br)cc3)nc12)S(C)(=O)=O	2.84509804
233	Clc1ccccc1Nc1ncc2ccn(-c3ccccn3)c2n1	2.84509804
234	Cc1cccc(Nc2ncc3ccn(-c4ccccn4)c3n2)c1	2.84509804
235	COc1ccccc1Nc1ncc2ccn(-c3ccccn3)c2n1	2.84509804
236	Cc1nc2c(s1)N(C)c1nc(Nc3ccc4c(c3)CCC(=O)N4)ncc1N(C)C2=O	2.826074803
237	COc1cc(Nc2ncc3scc(-c4ccccc4S(C)(=O)=O)c3n2)cc(OC)c1OC	2.824776462
238	Cc1nc2c(s1)N(C)c1nc(Nc3cnn(C)c3)ncc1N(C)C2=O	2.823474229
239	Fc1cc(F)cc(Nc2c(C(F)(F)F)cnc3[nH]c(-c4ccc(N5CCOCC5)cc4)cc23)c1	2.806179974
240	CNC(=O)c1ccccc1Nc1nc(Nc2cc(OC)c(OC)c(OC)c2)nnc1Cl	2.806179974
241	COC(=O)CNC(=O)Cc1cccc(-n2ccc3cnc(Nc4cc(OC)c(OC)c(OC)c4)nc32)c1	2.802773725
242	COc1cc(Nc2ncc3ccn(-c4cccc(C(=O)NCCN(C)C)n4)c3n2)cc(OC)c1OC	2.802089258
243	Cc1ccc(-c2cnc3ccccc3n2)cc1Nc1ncc2ccn(-c3ccccn3)c2n1	2.77815125
244	COc1cccc(Nc2ncc3ccn(-c4ccccn4)c3n2)c1	2.77815125
245	COC(=O)c1ccccc1Nc1nc(Nc2ccc(N3CCOCC3)cc2OC)n2ccnc2n1	2.755874856
246	COC(=O)c1ccccc1Nc1nc(Nc2cc(OC)c(OC)c(OC)c2)n2ccnc2n1	2.755874856
247	CNC(=O)c1ccccc1Nc1nc(Nc2ccc(CN)cc2)nnc1Cl	2.748188027
248	COC(=O)CNC(=O)c1cccc(-n2ccc3cnc(Nc4cc(OC)c(OC)c(OC)c4)nc32)n1	2.7355989
249	COc1cc(N2CCC(N3CCN(C)CC3)CC2)ccc1Nc1ncc2c(n1)N(C)c1oc(C)nc1C(=O)N2C	2.720159303
250	CNC(=O)c1ccccc1Nc1nc(Nc2ccc(N3CCOCC3)cc2OC)n2ccnc2n1	2.707570176
251	COc1cc(N2CCC(N3CCN(C)CC3)CC2)ccc1Nc1ncc2c(n1)N(C)c1scnc1C(=O)N2	2.707570176
252	COc1cc(Nc2ncc3ccn(-c4ccc(C)cc4)c3n2)cc(OC)c1OC	2.705007959
253	COc1cc(Nc2ncc3ccn(-c4ccccc4C#N)c3n2)cc(OC)c1OC	2.702430536
254	COc1cc(Nc2ncc3ccn(-c4nccs4)c3n2)cc(OC)c1OC	2.698970004
255	CN1c2ccc(-c3ccc(C(=O)N4CCC(CCO)CC4)cc3)cc2-c2[nH]ncc2S1(=O)=O	2.698970004
256	Cc1ccccc1Nc1ncc2ccn(-c3ccccn3)c2n1	2.698970004
257	C=COC(=O)NCc1ccc(Nc2nc(Nc3ccccc3C(=O)OC)n3ccnc3n2)cc1	2.698970004
258	COc1cc(Nc2ncc3ccn(-c4cnccc4Cl)c3n2)cc(OC)c1OC	2.698970004
259	O=C(OCCn1c([N+](=O)[O-])cnc1/C=C\c1c(F)cccc1Cl)c1cccc2c1OCCO2	2.653212514
260	CCNC(=O)c1ccccc1Nc1ncnc(Nc2ccc(CN)cc2)n1	2.643452676
261	COc1cc(Nc2ncc3ccn(-c4cccc(C(=O)NCCO)c4)c3n2)cc(OC)c1OC	2.63748973
262	CCNC(=O)Cc1cccc(-n2ccc3cnc(Nc4cc(OC)c(OC)c(OC)c4)nc32)c1	2.624282096
263	CC(=O)OC[C@H]1O[C@@H](O[C@H]2[C@H](OC(C)=O)[C@@H](OC(C)=O)[C@H](n3[se]c4ccccc4c3=O)O[C@@H]2COC(C)=O)[C@H](OC(C)=O)[C@@H](OC(C)=O)[C@H]1OC(C)=O	2.62324929
264	Cc1c(O)c(O)c2c(c1C=O)[C@@H]1O[C@H](O2)c2c(C)c(O)c(O)c(O)c2C1=O	2.62324929
265	CNC(=O)c1ccccc1Nc1ncnc(Nc2cc(OC)c(OC)c(OC)c2)n1	2.602059991
266	Cc1ccc(C(N)=O)cc1Nc1ncc2ccn(-c3ccccn3)c2n1	2.602059991
267	COc1cc(Nc2ncc3ccn(-c4cccc(C(=O)NCCCN)n4)c3n2)cc(OC)c1OC	2.598790507
268	COC(=O)c1ccccc1Nc1nc(Nc2ccc(N3CCOCC3)cc2OC)nc2nccn12	2.568201724
269	COC(=O)c1ccccc1Cc1nc(Nc2cc(OC)c(OC)c(OC)c2)nc2nccn12	2.568201724
270	CCNC(=O)c1cccc(-n2ccc3cnc(Nc4cc(OC)c(OC)c(OC)c4)nc32)c1	2.562292864
271	CCN1CCN(c2ccc(Nc3ncc4scc(-c5ccccc5[N+](=O)[O-])c4n3)cc2)CC1	2.557507202
272	CCNC(=O)CCc1cccc(-n2ccc3cnc(Nc4cc(OC)c(OC)c(OC)c4)nc32)c1	2.537819095
273	CNC(=O)c1ccccc1-n1ccc2cnc(Nc3cc(OC)c(OC)c(OC)c3)nc21	2.534026106
274	CNC(=O)c1ccccc1Nc1nc(Nc2ccc(N3CCOCC3)cc2)nnc1Cl	2.531478917
275	COC(=O)CNC(=O)CCc1cccc(-n2ccc3cnc(Nc4cc(OC)c(OC)c(OC)c4)nc32)c1	2.530199698
276	CNC(=O)CCc1cccc(-n2ccc3cnc(Nc4cc(OC)c(OC)c(OC)c4)nc32)c1	2.519827994
277	CNC(=O)c1ccccc1Nc1nc(Nc2ccc(N3CCOCC3)cc2OC)nc2nccn12	2.51851394
278	COc1cc(Nc2ncc3ccn(-c4cccc(C(=O)NC5CC5)c4)c3n2)cc(OC)c1OC	2.507855872
279	CCOC(=O)c1cccc(-c2csc3cnc(Nc4ccc(N5CCN(CC)CC5)cc4)nc23)c1	2.506505032
280	CN1c2ccc(NCc3ccc(F)cc3)cc2-c2c(cnn2C)S1(=O)=O	2.505149978
281	CNC(=O)c1ccccc1Nc1ncnc(Nc2ccc(N3CCOCC3)cc2OC)n1	2.505149978
282	COC(=O)c1ccccc1-n1ccc2cnc(Nc3cc(OC)c(OC)c(OC)c3)nc21	2.496929648
283	CNC(=O)c1ccccc1Nc1nc(Nc2cc(OC)c(OC)c(OC)c2)n2ccnc2n1	2.491361694
284	COc1ccncc1-n1ccc2cnc(Nc3cc(OC)c(OC)c(OC)c3)nc21	2.477121255
285	c1ccc(-n2ccc3cnc(Nc4cccc5c4CCCC5)nc32)nc1	2.477121255
286	CNC(=O)c1ccccc1Nc1ncnc(Nc2cc(CCC(N)=O)c(OC)c(OC)c2)n1	2.477121255
287	COc1cc(Nc2ncc3ccn(-c4cccc(C(=O)NCCNC(C)=O)c4)c3n2)cc(OC)c1OC	2.474216264
288	COC(=O)c1ccccc1Nc1nc(Nc2ccc(CN)cc2)n2ccnc2n1	2.447158031
289	COC(=O)c1ccccc1Nc1nc(Nc2cc(OC)c(OC)c(OC)c2)nc2nccn12	2.447158031
290	COc1cc(Nc2ncc3ccn(-c4cccc(C(=O)NCC#N)n4)c3n2)cc(OC)c1OC	2.444044796
291	Cc1ccc(-n2nc(C(C)(C)C)cc2NC(=O)Nc2ccc(-n3cnc4c(N)ncnc43)cc2)cc1	2.424881637
292	CNC(=O)c1cccc(-n2ccc3cnc(Nc4cc(OC)c(OC)c(OC)c4)nc32)c1	2.418301291
293	COc1ccccc1Cc1nnc(Cn2nnc3ccccc32)o1	2.397940009
294	COc1cc(Nc2ncc3ccn(-c4cccc(C(=O)NCCC#N)n4)c3n2)cc(OC)c1OC	2.383815366
295	COC(=O)c1ccccc1Nc1nc(Nc2ccc(CN)cc2)nc2nccn12	2.380211242
296	COc1cc(Nc2ncc3ccn(-c4cccc(CCC(=O)NCCN(C)C)c4)c3n2)cc(OC)c1OC	2.372912003
297	COc1cc(Nc2ncc3ccn(-c4cccc(C(F)(F)F)c4)c3n2)cc(OC)c1OC	2.371067862
298	COc1cc(Nc2ncc3ccn(-c4cccc(Cc5nn[nH]n5)c4)c3n2)cc(OC)c1OC	2.365487985
299	CNC(=O)c1ccccc1Nc1nc(Nc2ccc(N3CCOCC3)cc2OC)nnc1Cl	2.361727836
300	CNC(=O)c1ccccc1Nc1nc(Nc2cc(OC)c(OC)c(OC)c2)nc2nccn12	2.361727836
301	COc1cc(Nc2ncc3ccn(-c4cccc(C)c4)c3n2)cc(OC)c1OC	2.344392274
302	CNC(=O)c1ccccc1Nc1nc(Nc2ccc(CN)cc2)n2ccnc2n1	2.342422681
303	Cc1cc(-c2cc3c(NCc4cccnc4N(C)S(C)(=O)=O)c(C#N)cnc3[nH]2)ccn1	2.342422681
304	CCc1cc(Nc2nc(NCc3ccc(Cl)cc3OC)nc3cccc(OC)c23)n[nH]1	2.342422681
305	COc1cc(Nc2ncc3c(n2)N(c2ccccn2)CCC3)cc(OC)c1OC	2.301029996
306	CCOC(=O)Cc1cnc(Nc2cc(OC)c(OC)c(OC)c2)nc1Nc1ccccn1	2.301029996
307	COc1ccc(C)c(Nc2ncc3ccn(-c4ccccn4)c3n2)c1	2.301029996
308	COc1cc(Nc2ncc3c(n2)N(c2ccccn2)C(O)CC3)cc(OC)c1OC	2.301029996
309	Cc1nc2c(s1)N(C)c1nc(Nc3ccc(N4CCN(C)CC4)cn3)ncc1N(C)C2=O	2.292256071
310	CN(c1ncccc1CNc1c(C#N)cnc2[nH]c(-c3ccccc3)cc12)S(C)(=O)=O	2.290034611
311	CCN1CCN(c2ccc(Nc3ncc4scc(-c5ccccc5S(C)(=O)=O)c4n3)cc2)CC1	2.28780173
312	COc1cc(Nc2ncc3ccn(-c4cccc(C(=O)NCCN)n4)c3n2)cc(OC)c1OC	2.260071388
313	CNC(=O)c1ccccc1Cc1nc(Nc2cc(OC)c(OC)c(OC)c2)nc2nccn12	2.255272505
314	CN(c1ncccc1CNc1c(C#N)cnc2[nH]c(-c3ccc(F)cc3)cc12)S(C)(=O)=O	2.247973266
315	CNC(=O)c1ccc(Nc2ncc3c(n2)N(C)c2sc(C)nc2C(=O)N3C)cc1	2.238046103
316	CNC(=O)c1ccccc1Nc1c(Br)cnc2[nH]c(-c3ccc(F)cc3)nc12	2.230448921
317	CNC(=O)c1ccccc1Nc1ncnc(Nc2ccc(CN)cc2)n1	2.204119983
318	CN1CCN(c2ccc(C(=O)Nc3n[nH]c4ccc(Cc5cc(F)cc(F)c5)cc34)c(NC3CCOCC3)c2)CC1	2.146128036
319	CCCNC(=O)c1ccc(Nc2nc(NCC(F)(F)F)c3cc[nH]c3n2)cc1	2.133538908
320	COc1cc(N2CCC(N3CCN(C)CC3)CC2)ccc1Nc1ncc2c(n1)N(C)c1sc(C(F)(F)F)nc1C(=O)N2C	2.127104798
321	CN(c1ncccc1CNc1c(C(F)(F)F)cnc2[nH]c(-c3ccc(F)cc3)nc12)S(C)(=O)=O	2.113943352
322	COc1cc(Nc2ncc3ccn(-c4cccc(C#N)c4)c3n2)cc(OC)c1OC	2.100370545
323	CCN1CCN(c2ccc(Nc3ncc4scc(-c5ccc6ccccc6c5)c4n3)cc2)CC1	2.100370545
324	COc1cc(N2CCN(C)CC2)ccc1Nc1ncc2c(n1)N(C)c1cn(C)nc1C(=O)N2	2.089905111
325	CNC(=O)c1ccccc1Nc1nc(Nc2ccc(CN)cc2)nc2nccn12	2.079181246
326	COc1cc(Nc2ncc3ccn(-c4cccc(CCc5nn[nH]n5)c4)c3n2)cc(OC)c1OC	2.075546961
327	COc1cc(Nc2ncc3ccn(-c4cccc(CC(=O)NC5CC5)c4)c3n2)cc(OC)c1OC	2.068185862
328	COc1cc(Nc2ncc3ccn(-c4cccc(-c5nn[nH]n5)c4)c3n2)cc(OC)c1OC	2.06069784
329	COc1cc(Nc2ncc3c(n2)N(c2ccccn2)CC3)cc(OC)c1OC	2
330	COc1cc(Nc2ncc(Br)c(Nc3ccccn3)n2)cc(OC)c1OC	2
331	COc1cc(Nc2ncc3ccn(-c4cccnc4)c3n2)cc(OC)c1OC	2
332	COc1cc(Nc2ncc3ccn(-c4cccc(CCC#N)c4)c3n2)cc(OC)c1OC	1.968482949
333	COc1cc(Nc2ncc3scc(-c4cccc(S(C)(=O)=O)c4)c3n2)cc(OC)c1OC	1.959041392
334	CCn1cc(-c2ccc3c(c2)CCN3C(=O)Cc2cccc(OC(F)(F)F)c2)c2c(N)ncnc21	1.949390007
335	COc1cc(N2CCN(C)CC2=O)ccc1Nc1ncc2c(n1)N(C)c1sc(C)nc1C(=O)N2C	1.913813852
336	COc1cc(C(=O)N2CCC(N3CCN(C)CC3)CC2)ccc1Nc1ncc2c(n1)N(C)c1sc(C)nc1C(=O)N2C	1.892094603
337	COc1cc(Nc2ncc3scc(-c4ccccc4NS(C)(=O)=O)c3n2)cc(OC)c1OC	1.892094603
338	COc1cc(N2CCN(CCO)CC2)ccc1Nc1ncc2c(n1)N(C)c1sc(C)nc1C(=O)N2C	1.86923172
339	COc1cc(Nc2ncc3ccn(-c4cccc(C(=O)NCCN5CCCC5)c4)c3n2)cc(OC)c1OC	1.86332286
340	COc1cc(N2CCC(N3CCN(C)CC3)CC2)ccc1Nc1ncc2c(n1)N(CC(F)(F)F)c1sc(C)nc1C(=O)N2C	1.832508913
341	CS(=O)(=O)Nc1cccc(-c2csc3cnc(Nc4ccc(N5CCCCC5)cc4)nc23)c1	1.832508913
342	COc1cc(N2CCN(CCN(C)C)CC2)ccc1Nc1ncc2c(n1)N(C)c1sc(C)nc1C(=O)N2C	1.826074803
343	COc1cc(Nc2ncc3ccn(-c4cccc(CCC(=O)NCC(C)C)c4)c3n2)cc(OC)c1OC	1.799340549
344	COc1cc(Nc2ncc3ccn(-c4cccc(CC#N)c4)c3n2)cc(OC)c1OC	1.799340549
345	COc1cc(N2CCC(N3CCN(C)CC3)CC2)ccc1Nc1ncc2c(n1)N(C)c1sc(C)nc1C(=O)N2	1.793790385
346	COc1cc(N2CCC(N3CCN(C)CC3)CC2)ccc1Nc1ncc2c(n1)N(C)c1sc(C(C)C)nc1C(=O)N2C	1.770852012
347	CCN1CCN(c2ccc(Nc3ncc4scc(-c5cccc(C(=O)O)c5)c4n3)cc2)CC1	1.770852012
348	CNC(=O)c1ccccc1Nc1c(C(F)(F)F)cnc2[nH]c(-c3cccnc3)cc12	1.755874856
349	CNC(=O)c1ccc(Nc2ncc(C(F)(F)F)c(Nc3ccc(OC)cc3)n2)cc1	1.74530906
350	CCOc1cc(N2CCN(C)CC2)ccc1Nc1ncc2c(n1)N(C)c1sc(C)nc1C(=O)N2C	1.740362689
351	CNC(=O)c1ccccc1-c1csc2cnc(Nc3cc(OC)c(OC)c(OC)c3)nc12	1.740362689
352	COc1cc(Nc2ncc3ccn(-c4cccc(C(=O)NCCCN(C)C)c4)c3n2)cc(OC)c1OC	1.73239376
353	CCN1CCN(c2ccc(Nc3ncc4scc(-c5ccc6cc[nH]c6c5)c4n3)cc2)CC1	1.73239376
354	COc1cc(C2CCN(C)CC2)ccc1Nc1ncc2c(n1)N(C)c1sc(C)nc1C(=O)N2C	1.716003344
355	CNC(=O)c1ccccc1Nc1c(C(F)(F)F)cnc2[nH]c(-c3ccc(F)cc3)cc12	1.707570176
356	C=COC(=O)NCc1ccc(Nc2nc(Nc3ccccc3C(=O)NC)n3ccnc3n2)cc1	1.698970004
357	COc1cc(Nc2ncc3scc(-c4cccc(C(=O)O)c4)c3n2)cc(OC)c1OC	1.69019608
358	COc1cc(N2CCN(S(C)(=O)=O)CC2)ccc1Nc1ncc2c(n1)N(C)c1sc(C)nc1C(=O)N2C	1.672097858
359	CCCN1c2nc(Nc3ccc(N4CCC(N5CCN(C)CC5)CC4)cc3OC)ncc2N(C)C(=O)c2nc(C)sc21	1.672097858
360	Cc1nc2c(s1)N(C)c1nc(Nc3ccc(N4CCN(C)CC4)cc3OCCO)ncc1N(C)C2=O	1.667452953
361	COc1cc(N2CCN(C(C)=O)CC2)ccc1Nc1ncc2c(n1)N(C)c1sc(C)nc1C(=O)N2C	1.662757832
362	CNC(=O)c1ccccc1Nc1c(C(F)(F)F)cnc2[nH]c(-c3ccc(N4CCOCC4)cc3)cc12	1.653212514
363	CNC(=O)c1ccccc1Nc1c(C(F)(F)F)cnc2[nH]c(-c3ccc(N4CCOCC4)nc3)cc12	1.653212514
364	CNC(=O)c1ccc(Nc2ncc3c(n2)N(C)c2sc(C)nc2C(=O)N3C)c(OC)c1	1.653212514
365	COc1cc(N2CCNCC2)ccc1Nc1ncc2c(n1)N(C)c1sc(C)nc1C(=O)N2C	1.643452676
366	CNC(=O)c1ccc(Nc2ncc(C(F)(F)F)c(NCc3ccc(Br)cc3)n2)cc1	1.59835271
367	CNC(=O)c1ccc(Nc2ncc(C(F)(F)F)c(Nc3ccc(OC)c(F)c3)n2)cc1	1.591843411
368	COc1cc(Nc2ncc3ccn(-c4cccc(C(=O)NCCN(C)C)c4)c3n2)cc(OC)c1OC	1.579783597
369	COc1cc(Nc2ncc3ccn(-c4cccc(C(=O)O)c4)c3n2)cc(OC)c1OC	1.579783597
370	COc1cc2c(cc1Nc1ncc3c(n1)N(C)c1sc(C)nc1C(=O)N3C)CN(C)CC2	1.579783597
371	CNC(=O)c1ccccc1Nc1c(C#N)cnc2[nH]c(-c3ccc(F)cc3)cc12	1.568201724
372	CN(c1ncccc1CNc1c(C(F)(F)F)cnc2[nH]c(-c3ccc(F)cc3)cc12)S(C)(=O)=O	1.568201724
373	COc1cc(Nc2ncc3ccn(-c4cccc(CC(=O)O)c4)c3n2)cc(OC)c1OC	1.568201724
374	CCN1CCN(c2ccc(Nc3ncc4scc(-c5cccc(C(=O)NC)c5)c4n3)cc2)CC1	1.556302501
375	CNC(=O)c1ccc(Nc2ncc(C(F)(F)F)c(NCc3ccc(Cl)cc3)n2)cc1	1.548143637
376	COc1cc(Nc2ncc3ccn(-c4cccc(CCC(=O)O)c4)c3n2)cc(OC)c1OC	1.544068044
377	COc1cc(Nc2ncc3scc(-c4cccc(N(C)S(C)(=O)=O)c4)c3n2)cc(OC)c1OC	1.544068044
378	CNC(=O)c1ccc(Nc2ncc(C(F)(F)F)c(Nc3ccc(OC)c(Cl)c3)n2)cc1	1.540829814
379	CNC(=O)c1ccc(Nc2ncc(C(F)(F)F)c(Nc3ccccc3Cl)n2)cc1	1.536179532
380	CCN1CCN(c2ccc(Nc3ncc4scc(-c5cccc(N6CCCS6(=O)=O)c5)c4n3)cc2)CC1	1.51851394
381	COc1cc(N2CCN(C)CC2)c(C)cc1Nc1ncc2c(n1)N(C)c1sc(C)nc1C(=O)N2C	1.505149978
382	CCc1nc2c(s1)N(C)c1nc(Nc3ccc(N4CCC(N5CCN(C)CC5)CC4)cc3OC)ncc1N(C)C2=O	1.505149978
383	CNC(=O)c1ccc(Nc2ncc(C(F)(F)F)c(Nc3ccc(F)cc3)n2)cc1	1.494850022
384	CCN1CCN(c2ccc(Nc3ncc4scc(-c5cccnc5)c4n3)cc2)CC1	1.491361694
385	CNC(=O)c1ccc(Nc2ncc(C(F)(F)F)c(Nc3cccc(N)c3)n2)cc1	1.488127496
386	COc1cc(N2CCN(C)CC2)ccc1Nc1ncc2c(n1)N(C)c1sc(C)nc1C(=O)N2C	1.477121255
387	COc1cc(Nc2ncc3ccn(-c4cccc(C(=O)NCCN)c4)c3n2)cc(OC)c1OC	1.462397998
388	CCN1CCN(c2ccc(Nc3ncc4scc(-c5cnc6ccccc6c5)c4n3)cc2)CC1	1.462397998
389	CNC(=O)c1ccc(Nc2ncc(C(F)(F)F)c(NCc3ccc(OC)cc3)n2)cc1	1.458335626
390	COc1cc(Nc2ncc3scc(-c4cccnc4)c3n2)cc(OC)c1OC	1.414973348
391	CNC(=O)c1ccc(Nc2ncc(C(F)(F)F)c(Nc3ccc(N)cc3)n2)cc1	1.383635868
392	CNC(=O)c1ccc(Nc2ncc(C(F)(F)F)c(Nc3cccc(OC)c3)n2)cc1	1.36567514
393	CCN1c2nc(Nc3ccc(N4CCC(N5CCN(C)CC5)CC4)cc3OC)ncc2N(C)C(=O)c2nc(C)sc21	1.361727836
394	CNC(=O)c1ccc(Nc2ncc(C(F)(F)F)c(Nc3ccc(NC(C)=O)cc3)n2)cc1	1.32674538
395	CCN1CCN(c2ccc(Nc3ncc4scc(-c5cccc([N+](=O)[O-])c5)c4n3)cc2)CC1	1.322219295
396	CCN1CCN(c2ccc(Nc3ncc4scc(-c5cccc(N(C)S(C)(=O)=O)c5)c4n3)cc2)CC1	1.322219295
397	COc1cc(N2CCC(N3CCN(C)CC3)CC2)ccc1Nc1ncc2c(n1)N(C)c1sc(C)nc1C(=O)N2C	1.301029996
398	CCN1C(=O)c2nc(C)sc2N(C)c2nc(Nc3ccc(N4CCC(N5CCN(C)CC5)CC4)cc3OC)ncc21	1.278753601
399	CNC(=O)c1ccc(Nc2ncc(C(F)(F)F)c(Nc3ccc(NS(C)(=O)=O)cc3)n2)cc1	1.259832699
400	CN(C)c1ccc(Nc2ncc3scc(-c4cccc(NS(C)(=O)=O)c4)c3n2)cc1	1.255272505
401	COc1cc(Nc2ncc3scc(-c4ccccn4)c3n2)cc(OC)c1OC	1.255272505
402	CCN1CCN(c2ccc(Nc3ncc4scc(-c5cccc(S(C)(=O)=O)c5)c4n3)cc2)CC1	1.255272505
403	Cc1nc([C@](C)(O)CO)sc1-c1cnc(N)c(O[C@H](C)c2cc(F)ccc2-n2nccn2)c1	1.204119983
404	CS(=O)(=O)Nc1cccc(-c2csc3cnc(Nc4ccc(N5CCC(O)CC5)cc4)nc23)c1	1.204119983
405	COc1cc(Nc2ncc3scc(-c4ccccc4N(C)S(C)(=O)=O)c3n2)cc(OC)c1OC	1.176091259
406	Cc1ncsc1-c1ccc(CNC(=O)[C@@H]2C[C@@H](O)CN2C(=O)[C@@H](NC(=O)COCCCOc2ccc(Nc3ncc(C(F)(F)F)c(NCc4cccc(N(C)S(C)(=O)=O)c4)n3)cc2)C(C)(C)C)cc1	1.167317335
407	Cc1ncsc1-c1ccc(CNC(=O)[C@@H]2C[C@@H](O)CN2C(=O)[C@@H](NC(=O)CCOCCCOc2ccc(Nc3ncc(C(F)(F)F)c(NCc4cccc(N(C)S(C)(=O)=O)c4)n3)cc2)C(C)(C)C)cc1	1.161368002
408	CCN1CCN(c2cccc(Nc3ncc4scc(-c5cccc(NS(C)(=O)=O)c5)c4n3)c2)CC1	1.113943352
409	Cc1ncsc1-c1ccc(CNC(=O)[C@@H]2C[C@@H](O)CN2C(=O)[C@@H](NC(=O)CCOCCOCCOc2ccc(Nc3ncc(C(F)(F)F)c(NCc4cccc(N(C)S(C)(=O)=O)c4)n3)cc2)C(C)(C)C)cc1	1.103803721
410	CS(=O)(=O)Nc1cccc(-c2csc3cnc(Nc4ccc(N5CCNCC5)cc4)nc23)c1	1.079181246
411	CCN1CCN(c2ccc(Nc3ncc4scc(-c5cccc(OC)c5)c4n3)cc2)CC1	1.079181246
412	CCN1CCN(c2ccc(Nc3ncc4scc(-c5ccccn5)c4n3)cc2)CC1	1.079181246
413	CNC(=O)c1ccc(Nc2ncc(C(F)(F)F)c(Nc3ccccc3[N+](=O)[O-])n2)cc1	1.067814511
414	CN(c1cccc(CNc2nc(Nc3ccc(OCCCOCCC(=O)NCCOc4cccc5c4C(=O)N(C4CCC(=O)NC4=O)C5=O)cc3)ncc2C(F)(F)F)c1)S(C)(=O)=O	1.053078443
415	CC(=O)N1CCN(c2ccc(Nc3ncc(C(F)(F)F)c(N4Cc5cccc(N(C)S(C)(=O)=O)c5C4)n3)cc2)CC1	1.041392685
416	CCN1CCN(c2ccc(Nc3ncc4scc(-c5cccc(S(=O)(=O)NC)c5)c4n3)cc2)CC1	1.041392685
417	Cc1ncsc1-c1ccc(CNC(=O)[C@@H]2C[C@@H](O)CN2C(=O)[C@@H](NC(=O)COCCOc2ccc(Nc3ncc(C(F)(F)F)c(NCc4cccc(N(C)S(C)(=O)=O)c4)n3)cc2)C(C)(C)C)cc1	1.029383778
418	CCN1CCN(c2ccc(Nc3ncc4scc(-c5ccccc5)c4n3)cc2)CC1	1
419	CN(c1cccc(CNc2nc(Nc3ccc(OCCOCCOCCOCCOCCC(=O)NCCOc4cccc5c4C(=O)N(C4CCC(=O)NC4=O)C5=O)cc3)ncc2C(F)(F)F)c1)S(C)(=O)=O	0.986771734
420	CS(=O)(=O)Nc1cccc(-c2csc3cnc(Nc4ccc(N5CCOCC5)cc4)nc23)c1	0.903089987
421	COc1cc(Nc2ncc3scc(-c4cccc(NS(C)(=O)=O)c4)c3n2)cc(OC)c1OC	0.84509804
422	Cc1ncsc1-c1ccc(CNC(=O)[C@@H]2C[C@@H](O)CN2C(=O)[C@@H](NC(=O)CCOCCOc2ccc(Nc3ncc(C(F)(F)F)c(NCc4cccc(N(C)S(C)(=O)=O)c4)n3)cc2)C(C)(C)C)cc1	0.812913357
423	CNC(=O)c1ccc(Nc2ncc(C(F)(F)F)c(NCc3ccccc3Br)n2)cc1	0.798650645
424	CNC(=O)c1ccc(Nc2ncc(C(F)(F)F)c(NCc3ccccc3F)n2)cc1	0.763427994
425	CNC(=O)c1ccc(Nc2ncc(C(F)(F)F)c(NCc3ccccc3OC)n2)cc1	0.758154622
426	CNC(=O)c1ccc(Nc2ncc(C(F)(F)F)c(NCc3cccc(Cl)c3)n2)cc1	0.756636108
427	CNC(=O)c1ccccc1Nc1nc(Nc2ccc(N3CCOCC3)cc2)ncc1Cl	0.740362689
428	CN(c1cccc(CNc2nc(Nc3ccc(OCCOCCOCCC(=O)NCCOc4cccc5c4C(=O)N(C4CCC(=O)NC4=O)C5=O)cc3)ncc2C(F)(F)F)c1)S(C)(=O)=O	0.672097858
429	CNC(=O)c1ccc(Nc2ncc(C(F)(F)F)c(NCc3ccc(F)cc3)n2)cc1	0.64738297
430	CNC(=O)c1ccc(Nc2ncc(C(F)(F)F)c(NCc3cccc(F)c3)n2)cc1	0.627365857
431	CNC(=O)c1ccc(Nc2ncc(C(F)(F)F)c(NCc3cccc(Br)c3)n2)cc1	0.604226053
432	CS(=O)(=O)c1cccc(CNc2nc(Nc3ccc4c(c3)CCC(=O)N4)ncc2C(F)(F)F)c1	0.602059991
433	CNC(=O)c1ccc(Nc2ncc(C(F)(F)F)c(NCc3ccccc3Cl)n2)cc1	0.439332694
434	CNC(=O)c1ccc(Nc2ncc(C(F)(F)F)c(Nc3ccccc3OC)n2)cc1	0.271841607
435	CN(c1ncccc1CNc1nc(Nc2ccc3c(c2)CC(=O)N3)ncc1C(F)(F)F)S(C)(=O)=O	0
436	C=CC(=O)NCCNc1c(NCc2ccc(Nc3ncc(Cl)c(Nc4ccccc4C(=O)NC)n3)cc2)c(=O)c1=O	-0.22184875
437	CONC(=O)c1ccccc1Nc1cc(Nc2cc(C)nn2C(C)C)ncc1Cl	-0.397940009
